# Supplementary material
Source: PubMed Central journal article supplement (PMC8006533)

## Supplementary webappendix

This webappendix formed part of the original submission and has been peer reviewed. We post it as supplied by the authors.

Supplement to: Ahmed SM, Hall AJ, Robinson AE, et al. Global prevalence of norovirus in cases of gastroenteritis: a systematic review and meta-analysis. *Lancet Infect Dis* 2014; published online June 27. [http://dx.doi.org/10.1016/S1473-3099\(14\)70767-4](http://dx.doi.org/10.1016/S1473-3099(14)70767-4).

## SUPPLEMENT

**Table S1A: Search Strategy  
Ovid MEDLINE(R) and Ovid OLDMEDLINE(R) 1946 to February Week 4 2014**

| #  | Searches                                                       | Results |
|----|----------------------------------------------------------------|---------|
| 1  | Norwalk virus.sh.                                              | 664     |
| 2  | (norwalk not (norwalk adj (ct or conn or connecticut))).ti,ab. | 950     |
| 3  | Norovirus.sh.                                                  | 2133    |
| 4  | norovirus*.ti,ab.                                              | 2530    |
| 5  | Norwalk-like virus*.ti,ab.                                     | 364     |
| 6  | nlv.ti,ab.                                                     | 203     |
| 7  | Caliciviridae.sh.                                              | 656     |
| 8  | Caliciviridae Infections.sh.                                   | 2382    |
| 9  | (human adj2 calicivirus*).ti,ab.                               | 219     |
| 10 | calicivirus*.ti,ab.                                            | 1351    |
| 11 | small round virus*.ti,ab.                                      | 70      |
| 12 | small round structured virus*.ti,ab.                           | 191     |
| 13 | or/1-12                                                        | 4986    |
| 14 | limit 13 to yr="2008-Current"                                  | 2244    |
| 15 | limit 14 to humans                                             | 1601    |
| 16 | remove duplicates from 15                                      | 1565    |

**Table S1B: Search Strategy  
Embase 1996 to 2014 Week 10**

| #  | Searches                                                       | Results |
|----|----------------------------------------------------------------|---------|
| 1  | Norwalk virus.sh.                                              | 0       |
| 2  | Norwalk gastroenteritis virus.sh.                              | 631     |
| 3  | (norwalk not (norwalk adj (ct or conn or connecticut))).ti,ab. | 774     |
| 4  | Norovirus.sh.                                                  | 3325    |
| 5  | norovirus*.ti,ab.                                              | 3351    |
| 6  | Norwalk-like virus*.ti,ab.                                     | 363     |
| 7  | nlv.ti,ab.                                                     | 237     |
| 8  | Caliciviridae.sh.                                              | 0       |
| 9  | calicivirus.sh.                                                | 1063    |
| 10 | Caliciviridae Infections.sh.                                   | 0       |
| 11 | calicivirus infection.sh.                                      | 408     |
| 12 | (human adj2 calicivirus*).ti,ab.                               | 205     |
| 13 | calicivirus*.ti,ab.                                            | 1134    |
| 14 | small round virus*.ti,ab.                                      | 24      |
| 15 | small round structured virus*.ti,ab.                           | 123     |
| 16 | or/1-15                                                        | 5624    |
| 17 | limit 16 to yr="2008-Current"                                  | 3305    |
| 18 | limit 17 to humans                                             | 2052    |
| 19 | remove duplicates from 18                                      | 1950    |

**Table S1C: Search Strategy  
Global Health 1973 to 2014 Week 09**

| #  | Searches                                                                     | Results |
|----|------------------------------------------------------------------------------|---------|
| 1  | Norwalk virus*.mp.                                                           | 397     |
| 2  | (norwalk not (norwalk adj (ct or conn or connecticut))).mp.                  | 649     |
| 3  | Norovirus.mp.                                                                | 2653    |
| 4  | Norwalk-like virus*.mp.                                                      | 310     |
| 5  | nlv.mp.                                                                      | 123     |
| 6  | Caliciviridae.mp.                                                            | 2916    |
| 7  | Caliciviridae Infections.mp.                                                 | 0       |
| 8  | (human adj2 calicivirus*).mp.                                                | 153     |
| 9  | calicivirus*.mp.                                                             | 646     |
| 10 | small round virus*.mp.                                                       | 29      |
| 11 | small round structured virus*.mp.                                            | 155     |
| 12 | or/1-11                                                                      | 3345    |
| 13 | limit 12 to yr="2008-Current"                                                | 1884    |
| 14 | limit 13 to humans [Limit not valid in Global Health; records were retained] | 1884    |

| Ref. No. | Author              | Year of Pub. | Title                                                                                                                                                                      | Journal                         | Start Date | End Date   | Country | No. Tested | No. NoV+ | No. Con. Tested | No. Con. NoV+ | Age Category | Setting    | Stratum   | Incl. Novel Strain (1=Y, 0=N) |
|----------|---------------------|--------------|----------------------------------------------------------------------------------------------------------------------------------------------------------------------------|---------------------------------|------------|------------|---------|------------|----------|-----------------|---------------|--------------|------------|-----------|-------------------------------|
| 1        | Abugalia            | 2011         | Clinical Features and Molecular Epidemiology of Rotavirus and Norovirus Infections in Libyan Children                                                                      | Journal of Medical Virology     | 10/1/2007  | 9/30/2008  | Libya   | 260        | 36       | 0               | 0             | unders       | Inpatient  | LMD       | 0                             |
| 1        | Abugalia            | 2011         | Clinical Features and Molecular Epidemiology of Rotavirus and Norovirus Infections in Libyan Children                                                                      | Journal of Medical Virology     | 10/1/2007  | 9/30/2008  | Libya   | 260        | 55       | 0               | 0             | unders       | Outpatient | LMD       | 0                             |
| 2        | Ahenda              | 2012         | Viral etiologies of diarrhea among children attending Iwak missing hospital in asembo, western kenya                                                                       | ASTMH                           | 1/1/2007   | 6/30/2010  | Kenya   | 206        | 13       | 0               | 0             | unders       | Outpatient | HMD       | 0                             |
| 3        | Ajjampur            | 2008         | Closing the diarrhoea diagnostic gap in Indian children by the application of molecular techniques                                                                         | Journal of Medical Microbiology | 1/1/2003   | 12/31/2003 | India   | 158        | 25       | 99              | 7             | unders       | Inpatient  | HMD       | 0                             |
| 4        | Amar, C.F., et al., | 2007         | Detection by PCR of eight groups of enteric pathogens in 4,627 faecal samples: re-examination of the English case-control Infectious Intestinal Disease Study (1993-1996). | Eur J Clin Microbiol Infect Dis | 1/1/1993   | 12/31/1996 | England | 1776       | 547      | 1505            | 156           | over         | Community  | Developed | 0                             |
| 4        | Amar, C.F., et al., | 2007         | Detection by PCR of eight groups of enteric pathogens in 4,627 faecal samples: re-examination of the English case-control Infectious Intestinal Disease Study (1993-1996). | Eur J Clin Microbiol Infect Dis | 1/1/1993   | 12/31/1996 | England | 646        | 324      | 700             | 202           | unders       | Community  | Developed | 0                             |

|    |          |      |                                                                                                                                                      |                                                                   |           |            |             |      |     |     |    |    |        |            |           |   |
|----|----------|------|------------------------------------------------------------------------------------------------------------------------------------------------------|-------------------------------------------------------------------|-----------|------------|-------------|------|-----|-----|----|----|--------|------------|-----------|---|
| 5  | Aragao   | 2013 | Norovirus diversity in diarrheic children from a african descendent settlement in belem, norther brazil                                              | PLoS ONE [Electronic Resource]                                    | 4/1/2008  | 7/31/2010  | Brazil      | 81   | 16  | 78  | 0  | 0  | under5 | Community  | LMD       | 0 |
| 6  | Bagci    | 2010 | Clinical characteristics of viral intestinal infection in preterm and term neonates                                                                  | European Journal of Clinical Microbiology and Infectious Diseases | 1/1/1998  | 12/31/2007 | Germany     | 567  | 8   | 0   | 0  | 0  | under5 | Inpatient  | Developed | 1 |
| 7  | Ballard  | 2013 | A case - control study of norovirus induced acute diarrhea among army recruits in peru                                                               | ASTMH                                                             | 10/1/2005 | 7/1/2011   | Peru        | 200  | 28  | 200 | 16 | 16 | other  | Outpatient | HMD       | 1 |
| 8  | Barreira | 2010 | Viral load and genotypes of noroviruses in symptomatic and asymptomatic children in Southeastern Brazil                                              | Journal of Clinical Virology                                      | 2/1/2003  | 6/1/2004   | Brazil      | 229  | 40  | 90  | 12 | 12 | under5 | Inpatient  | LMD       | 0 |
| 9  | Beersma  | 2009 | Norovirus in a Dutch tertiary care hospital (2002e2007): frequent nosocomial transmission and dominance of GIIB strains in young children            | Journal of Hospital Infection                                     | 7/1/2002  | 6/1/2007   | Netherlands | 822  | 82  | 0   | 0  | 0  | over5  | Inpatient  | Developed | 1 |
| 9  | Beersma  | 2009 | Norovirus in a Dutch tertiary care hospital (2002e2007): frequent nosocomial transmission and dominance of GIIB strains in young children            | Journal of Hospital Infection                                     | 7/1/2002  | 6/1/2007   | Netherlands | 1636 | 139 | 0   | 0  | 0  | other  | Inpatient  | Developed | 1 |
| 10 | Boga     | 2004 | Etiology of sporadic cases of pediatric acute gastroenteritis in asturias, Spain, and genotyping and characterization of norovirus strains involved. | J Clin Microbiol 42                                               | 11/1/2000 | 10/1/2001  | Spain       | 363  | 16  | 0   | 0  | 0  | other  | Inpatient  | Developed | 0 |

|    |               |      |                                                                                                                                                                                         |                                          |          |            |               |     |     |   |   |   |        |            |           |   |
|----|---------------|------|-----------------------------------------------------------------------------------------------------------------------------------------------------------------------------------------|------------------------------------------|----------|------------|---------------|-----|-----|---|---|---|--------|------------|-----------|---|
| 11 | Bresee        | 2012 | The Etiology of Severe Acute Gastroenteritis Among Adults Visiting Emergency Departments in the United States                                                                           | Journal of Infectious Diseases           | 9/1/1999 | 8/1/2001   | United States | 264 | 42  | 0 | 0 | 0 | over5  | Inpatient  | Developed | 0 |
| 12 | Bruggink      | 2010 | Molecular and Epidemiological Characteristics of Norovirus Associated with Community-Based Sporadic Gastroenteritis Incidents and Norovirus Outbreaks in Victoria, Australia, 2002Ð2007 | Intervirology                            | 1/1/2002 | 12/31/2007 | Australia     | 445 | 116 | 0 | 0 | 0 | other  | Community  | Developed | 1 |
| 13 | Cashman       | 2012 | Detection of human bocaviruses 1, 2 and 3 in Irish children presenting with gastroenteritis                                                                                             | Archives of Virology                     | 1/1/2006 | 12/31/2008 | Ireland       | 155 | 46  | 0 | 0 | 0 | other  | Inpatient  | Developed | 1 |
| 14 | Chaimongkol I | 2012 | A Wide Variety of Diarrhea Viruses Circulating in Pediatric Patients in Thailand                                                                                                        | Clinical Laboratory                      | 1/1/2007 | 12/31/2007 | Thailand      | 160 | 24  | 0 | 0 | 0 | under5 | Inpatient  | LMD       | 0 |
| 15 | Chan-It       | 2012 | Emergence of a New Norovirus GI.6 Variant in Japan, 2008Ð2009                                                                                                                           | Journal of Medical Virology              | 7/1/2008 | 6/1/2009   | Japan         | 187 | 104 | 0 | 0 | 0 | other  | Outpatient | Developed | 0 |
| 16 | Chan-It       | 2011 | Detection and Genetic Characterization of Norovirus Infections in Children with Acute Gastroenteritis in Japan, 2007-2009                                                               | Clinical Laboratory                      | 7/1/2007 | 6/1/2009   | Japan         | 954 | 254 | 0 | 0 | 0 | other  | Outpatient | Developed | 0 |
| 17 | Chen          | 2009 | Norovirus Infection as a Cause of Diarrhea-Associated Benign Infantile Seizures                                                                                                         | Clinical Infectious Diseases             | 8/1/2004 | 1/31/2007  | Taiwan        | 353 | 64  | 0 | 0 | 0 | other  | Inpatient  | LMD       | 1 |
| 18 | Chen          | 2013 | Severe viral gastroenteritis in children after suboptimal rotavirus immunization in taiwan                                                                                              | The Pediatric Infectious Disease Journal | 4/1/2004 | 3/1/2011   | Taiwan        | 755 | 128 | 0 | 0 | 0 | other  | Inpatient  | LMD       | 1 |

|    |                      |      |                                                                                                          |                              |           |            |             |     |     |     |   |   |   |        |            |           |   |
|----|----------------------|------|----------------------------------------------------------------------------------------------------------|------------------------------|-----------|------------|-------------|-----|-----|-----|---|---|---|--------|------------|-----------|---|
| 19 | Chen                 | 2012 | Monitoring and analysis on pathogens of viral gastroenteritis in Nanhai of Foshan                        | Modern Preventive Medicine   | 3/1/2009  | 2/1/2010   | China       | 426 | 22  | 0   | 0 | 0 | 0 | other  | Unknown    | LMD       | 0 |
| 20 | Chen                 | 2012 | Molecular epidemiological study on norovirus in infants with diarrhea in Xiamen                          |                              | 5/1/2010  | 4/20/2011  | China       | 366 | 81  | 0   | 0 | 0 | 0 | under5 | Unknown    | LMD       | 0 |
| 21 | Chhabra              | 2008 | Norovirus genotype IIb associated acute gastroenteritis in India                                         | Journal of Clinical Virology | 12/1/2005 | 2/1/2007   | India       | 192 | 24  | 0   | 0 | 0 | 0 | under5 | Inpatient  | HMD       | 1 |
| 21 | Chhabra              | 2008 | Norovirus genotype IIb associated acute gastroenteritis in India                                         | Journal of Clinical Virology | 12/1/2005 | 2/1/2007   | India       | 44  | 4   | 0   | 0 | 0 | 0 | under5 | Outpatient | HMD       | 1 |
| 22 | Chhabra              | 2009 | gastroenteritis in India                                                                                 | Journal of Medical Virology  | 7/1/2005  | 6/1/2007   | India       | 570 | 72  | 0   | 0 | 0 | 0 | other  | Unknown    | HMD       | 1 |
| 22 | Chhabra              | 2009 | Epidemiological, Clinical, and Molecular Features of Norovirus Infections in Western India               | Journal of Medical Virology  | 7/1/2005  | 6/1/2007   | India       | 70  | 5   | 0   | 0 | 0 | 0 | other  | Unknown    | HMD       | 1 |
| 22 | Chhabra              | 2009 | Epidemiological, Clinical, and Molecular Features of Norovirus Infections in Western India               | Journal of Medical Virology  | 7/1/2005  | 6/1/2007   | India       | 190 | 12  | 0   | 0 | 0 | 0 | other  | Unknown    | HMD       | 1 |
| 23 | Colomba, C., et al., | 2007 | Norovirus and gastroenteritis in hospitalized children, Italy.                                           | Emerg Infect Dis             | 1/1/2004  | 12/31/2004 | Italy       | 365 | 93  | 0   | 0 | 0 | 0 | under5 | Inpatient  | Developed | 0 |
| 24 | Cunliffe             | 2010 | Healthcare-associated Viral Gastroenteritis among Children in a Large Pediatric Hospital, United Kingdom | Emerging Infectious Diseases | 1/1/2006  | 12/31/2007 | England     | 351 | 54  | 0   | 0 | 0 | 0 | other  | Outpatient | Developed | 1 |
| 25 | Dai                  | 2011 | Molecular epidemiology of norovirus gastroenteritis in children in Jiangmen, China, 2005D2007            | Archives of Virology         | 9/1/2005  | 8/1/2007   | China       | 881 | 115 | 0   | 0 | 0 | 0 | other  | Outpatient | LMD       | 1 |
| 26 | de Wit               | 2001 | Gastroenteritis in sentinel general practices, The Netherlands.                                          | Emerg Infect Dis             | 5/1/1996  | 4/1/1999   | Netherlands | 857 | 43  | 574 | 6 | 0 | 0 | other  | Outpatient | Developed | 0 |

|    |         |      |                                                                                                                                |                                                                         |           |            |             |      |     |     |    |        |            |           |   |
|----|---------|------|--------------------------------------------------------------------------------------------------------------------------------|-------------------------------------------------------------------------|-----------|------------|-------------|------|-----|-----|----|--------|------------|-----------|---|
| 27 | de Wit  | 2001 | Sensor, a population-based cohort study on gastroenteritis in the Netherlands: incidence and etiology.                         | Am J Epidemiol 154                                                      | 12/1/1998 | 12/1/1999  | Netherlands | 236  | 29  | 0   | 0  | over5  | Community  | Developed | 0 |
| 27 | de Wit  | 2001 | Sensor, a population-based cohort study on gastroenteritis in the Netherlands: incidence and etiology.                         | Am J Epidemiol 154                                                      | 12/1/1998 | 12/1/1999  | Netherlands | 472  | 85  | 669 | 35 | under5 | Community  | Developed | 0 |
| 28 | Deng    | 2009 | [Comparative analysis on clinical manifestations for gastroenteritis caused by norovirus and rotavirus]                        | Chung-Hua Liu Hsing Ping Hsueh Tsa Chih Chinese Journal of Epidemiology | 1/1/2002  | 12/31/2006 | China       | 318  | 79  | 0   | 0  | other  | Inpatient  | LMD       | 1 |
| 29 | Dey     | 2011 | Genetic Diversity and Emergence of Norovirus GII/4-2006b in Japan During 2006-2007                                             | Clinical Laboratory                                                     | 7/1/2006  | 6/1/2007   | Japan       | 628  | 99  | 0   | 0  | other  | Unknown    | Developed | 1 |
| 30 | Dey     | 2010 | SEASONAL PATTERN AND GENOTYPE DISTRIBUTION OF NOROVIRUS INFECTION IN JAPAN                                                     | The Pediatric Infectious Disease Journal                                | 7/1/1995  | 6/1/2007   | Japan       | 6231 | 779 | 0   | 0  | other  | Unknown    | Developed | 1 |
| 31 | Dove    | 2005 | Detection and characterization of human caliciviruses in hospitalized children with acute gastroenteritis in Blantyre, Malawi. | J Med Virol 77                                                          | 7/1/1998  | 6/1/1999   | Malawi      | 398  | 26  | 0   | 0  | under5 | Inpatient  | HMD       | 0 |
| 32 | Estevez | 2013 | Prevalence and genetic diversity of norovirus among patients with acute diarrhea in guatemala                                  | Journal of Medical Virology                                             | 10/1/2007 | 8/1/2010   | Guatemala   | 528  | 114 | 0   | 0  | other  | Inpatient  | HMD       | 0 |
| 32 | Estevez | 2013 | Prevalence and genetic diversity of norovirus among patients with acute diarrhea in guatemala                                  | Journal of Medical Virology                                             | 10/1/2007 | 8/1/2010   | Guatemala   | 1875 | 227 | 0   | 0  | other  | Outpatient | HMD       | 0 |

|    |           |      |                                                                                                                                                                                                                            |           |            |        |      |     |   |   |   |        |            |           |   |
|----|-----------|------|----------------------------------------------------------------------------------------------------------------------------------------------------------------------------------------------------------------------------|-----------|------------|--------|------|-----|---|---|---|--------|------------|-----------|---|
| 33 | Fazeli    | 2010 | Hospital based study of Gastroenterology and prevalence and genotyping of Hepatology noroviruses and from Bed to sapoviruses isolated Bench acute gastroenteritis from children with referred to Masih Daneshvari hospital | 2/1/2006  | 10/1/2008  | Iran   | 47   | 10  | 0 | 0 | 0 | other  | Inpatient  | LMD       | 1 |
| 34 | Feng      | 2008 | [Molecular epidemiological study on norovirus among children with acute diarrhea in Guangzhou]                                                                                                                             | 12/1/2006 | 12/1/2007  | China  | 1260 | 257 | 0 | 0 | 0 | other  | Unknown    | LMD       | 1 |
| 35 | Fernandez | 2011 | Noroviruses as cause of gastroenteritis in elderly patients                                                                                                                                                                | 10/1/2000 | 9/1/2007   | Spain  | 2026 | 131 | 0 | 0 | 0 | under5 | Unknown    | Developed | 1 |
| 35 | Fernandez | 2011 | Noroviruses as cause of gastroenteritis in elderly patients                                                                                                                                                                | 10/1/2000 | 9/1/2007   | Spain  | 1998 | 186 | 0 | 0 | 0 | over5  | Unknown    | Developed | 1 |
| 36 | Ferreira  | 2010 | Surveillance of Norovirus Infections in the State of Rio De Janeiro, Brazil                                                                                                                                                | 1/1/2005  | 12/31/2008 | Brazil | 176  | 80  | 0 | 0 | 0 | over5  | Inpatient  | LMD       | 1 |
| 36 | Ferreira  | 2010 | Surveillance of Norovirus Infections in the State of Rio De Janeiro, Brazil                                                                                                                                                | 1/1/2005  | 12/31/2008 | Brazil | 58   | 12  | 0 | 0 | 0 | over5  | Outpatient | LMD       | 1 |
| 36 | Ferreira  | 2010 | Surveillance of Norovirus Infections in the State of Rio De Janeiro, Brazil                                                                                                                                                | 1/1/2005  | 12/31/2008 | Brazil | 85   | 46  | 0 | 0 | 0 | under5 | Inpatient  | LMD       | 1 |
| 36 | Ferreira  | 2010 | Surveillance of Norovirus Infections in the State of Rio De Janeiro, Brazil                                                                                                                                                | 1/1/2005  | 12/31/2008 | Brazil | 671  | 224 | 0 | 0 | 0 | under5 | Outpatient | LMD       | 1 |



|    |           |      |                                                                                                                                           |                                             |           |            |          |     |     |   |   |   |   |        |            |           |   |
|----|-----------|------|-------------------------------------------------------------------------------------------------------------------------------------------|---------------------------------------------|-----------|------------|----------|-----|-----|---|---|---|---|--------|------------|-----------|---|
| 37 | Ferreira  | 2012 | Assessment of Gastroenteric Viruses Frequency in a Children's Day Care Center in Rio De Janeiro, Brazil: A Fifteen Year Study (1994-2008) | PLoS ONE [Electronic Resource]              | 1/1/1994  | 12/31/2008 | Brazil   | 130 | 44  | 0 | 0 | 0 | 0 | under5 | Community  | LMD       | 1 |
| 38 | Finamore  | 2011 | G2 as an emerging rotavirus strain in pediatric gastroenteritis in southern Italy                                                         | Infection                                   | 1/1/2007  | 12/31/2008 | Italy    | 421 | 134 | 0 | 0 | 0 | 0 | under5 | Outpatient | Developed | 0 |
| 39 | Galeano   | 2013 | Molecular epidemiology of norovirus strains in paraguayen children during 2004-2005. Description of possible new GI4 cluster              | Journal of Clinical Virology                | 1/1/2004  | 12/1/2005  | Paraguay | 378 | 161 | 0 | 0 | 0 | 0 | under5 | Inpatient  | LMD       | 0 |
| 40 | Gao       | 2011 | Clinical and Molecular Epidemiologic Analyses of Norovirus-Associated Sporadic Gastroenteritis in Adults From Beijing, China              | Journal of Medical Virology                 | 10/1/2007 | 9/1/2008   | China    | 403 | 48  | 0 | 0 | 0 | 0 | over5  | Outpatient | LMD       | 0 |
| 41 | Gauci     | 2010 | The aetiology of infectious intestinal disease in the community in Malta                                                                  | Malta Medical Journal                       | 4/1/2004  | 12/1/2005  | Malta    | 30  | 6   | 0 | 0 | 0 | 0 | other  | Community  | Developed | 0 |
| 42 | Giammanco | 2012 | Recombinant norovirus GI.12/GII.12 gastroenteritis in children                                                                            | Infection, Genetics and Evolution           | 1/1/2009  | 3/1/2010   | Italy    | 759 | 147 | 0 | 0 | 0 | 0 | other  | Inpatient  | Developed | 0 |
| 42 | Giammanco | 2012 | Recombinant norovirus GI.12/GII.12 gastroenteritis in children                                                                            | Infection, Genetics and Evolution           | 1/1/2009  | 3/1/2010   | Italy    | 615 | 69  | 0 | 0 | 0 | 0 | under5 | Inpatient  | Developed | 0 |
| 43 | Goldfarb  | 2013 | Nanolitre real-time PCR detection of bacterial, parasitic, and viral agents from patients with diarrhoea in Nunavut, Canada               | International Journal of Circumpolar Health | 1/1/2010  | 6/1/2011   | Canada   | 86  | 3   | 0 | 0 | 0 | 0 | other  | Inpatient  | Developed | 0 |

|    |                    |      |                                                                                                                                                            |                                      |           |            |               |      |     |     |   |   |   |        |            |           |   |
|----|--------------------|------|------------------------------------------------------------------------------------------------------------------------------------------------------------|--------------------------------------|-----------|------------|---------------|------|-----|-----|---|---|---|--------|------------|-----------|---|
| 44 | Gomez-Santiago     | 2012 | Molecular characterization of human calicivirus associated with acute diarrheal disease in mexican children                                                | Virology Journal                     | 10/1/2005 | 12/1/2006  | Mexico        | 414  | 128 | 0   | 0 | 0 | 0 | under5 | Unknown    | LMD       | 0 |
| 45 | Gong               | 2008 | Molecular epidemiologic investigation of norovirus infections in Incheon city, Korea, from 2005 to 2007.                                                   | Journal of Bacteriology and Virology | 1/1/2005  | 12/31/2007 | Korea         | 6618 | 708 | 0   | 0 | 0 | 0 | other  | Unknown    | LMD       | 1 |
| 46 | Gonzalez           | 2011 | Molecular Epidemiology of Enteric Viruses in Children with Sporadic Gastroenteritis in Valencia, Venezuela                                                 |                                      | 1/1/2003  | 12/31/2003 | Venezuela     | 480  | 61  | 0   | 0 | 0 | 0 | under5 | Impatient  | LMD       | 0 |
| 47 | Gonzalez-Galan     | 2011 | High prevalence of community-acquired norovirus gastroenteritis among hospitalized children: a prospective study                                           | Clinical Microbiology and Infection  | 4/1/2006  | 4/1/2007   | Spain         | 399  | 107 | 0   | 0 | 0 | 0 | under5 | Impatient  | Developed | 1 |
| 48 | Grant              | 2012 | Epidemiologic and Clinical Features of Other Enteric Viruses Associated with Acute Gastroenteritis in American Indian Infants                              | The Journal of Pediatrics            | 3/1/2002  | 2/1/2004   | United States | 247  | 80  | 344 | 0 | 0 | 0 | under5 | Outpatient | Developed | 1 |
| 49 | Guo                | 2009 | Genetic analysis of norovirus in children affected with acute gastroenteritis in Beijing, 2004D2007                                                        | Journal of Clinical Virology         | 3/1/2004  | 11/1/2007  | China         | 1126 | 100 | 0   | 0 | 0 | 0 | other  | Impatient  | LMD       | 1 |
| 50 | Gutierrez-Escolano | 2010 | Human Caliciviruses Detected in Mexican Children Admitted to Hospital During 1998D2000, With Severe Acute Gastroenteritis Not Due to Other Enteropathogens | Journal of Medical Virology          | 3/1/1998  | 12/1/2000  | Mexico        | 299  | 20  | 0   | 0 | 0 | 0 | under5 | Impatient  | LMD       | 0 |

|    |          |      |                                                                                                                                                                                              |                                |           |           |               |      |     |   |   |   |        |            |           |   |
|----|----------|------|----------------------------------------------------------------------------------------------------------------------------------------------------------------------------------------------|--------------------------------|-----------|-----------|---------------|------|-----|---|---|---|--------|------------|-----------|---|
| 51 | Hall     | 2011 | Incidence of Acute Gastroenteritis and Role of Norovirus, Georgia, USA, 2004-2005                                                                                                            | Emerging Infectious Diseases   | 3/1/2004  | 3/1/2005  | United States | 572  | 25  | 0 | 0 | 0 | other  | Outpatient | Developed | 0 |
| 52 | Han      | 2011 | Emergence of norovirus GI-4/2008 variant and recombinant strains in Seoul, Korea                                                                                                             | Archives of Virology           | 8/1/2008  | 2/1/2010  | Korea         | 649  | 119 | 0 | 0 | 0 | other  | Inpatient  | LMD       | 0 |
| 53 | Hansman  | 2004 | Detection of norovirus and sapovirus infection among children with gastroenteritis in Ho Chi Minh City, Vietnam.                                                                             | Arch Virol                     | 12/1/1999 | 11/1/2000 | Vietnam       | 1339 | 72  | 0 | 0 | 0 | other  | Inpatient  | LMD       | 0 |
| 54 | Hansman  | 2004 | Genetic diversity of norovirus and sapovirus in hospitalized infants with sporadic cases of acute gastroenteritis in Chiang Mai, Thailand.                                                   | J Clin Microbiol               | 7/1/2000  | 7/1/2001  | Thailand      | 105  | 9   | 0 | 0 | 0 | under5 | Inpatient  | LMD       | 0 |
| 55 | Harada   | 2009 | Surveillance of Pathogens in Outpatients With Gastroenteritis and Characterization of Sapovirus Strains Between 2002 and 2007 in Kumamoto Prefecture, Japan                                  | Journal of Medical Virology    | 6/1/2002  | 12/1/2007 | Japan         | 639  | 260 | 0 | 0 | 0 | other  | Outpatient | Developed | 1 |
| 56 | Zaafrane | 2013 | Prevalence and genetic diversity of norovirus infection in tunisian children (2007-2010)                                                                                                     | Journal of Medical Virology    | 4/1/2007  | 4/1/2010  | Tunisia       | 407  | 38  | 0 | 0 | 0 | under5 | Inpatient  | LMD       | 0 |
| 57 | Hemming  | 2013 | Major reduction of rotavirus, but not norovirus, gastroenteritis in children seen in hospital after the introduction of RotaTeq vaccine into the national immunization programmed in Finland | European Journal of Pediatrics | 9/1/2009  | 8/1/2011  | Finland       | 330  | 111 | 0 | 0 | 0 | other  | Inpatient  | Developed | 0 |

|    |           |      |                                                                                                                                    |                                     |          |            |         |       |     |   |   |   |        |            |           |   |
|----|-----------|------|------------------------------------------------------------------------------------------------------------------------------------|-------------------------------------|----------|------------|---------|-------|-----|---|---|---|--------|------------|-----------|---|
| 58 | Huh       | 2009 | Viral etiology and incidence associated with acute gastroenteritis in a 5-year survey in Gyeonggi province, South Korea            | Journal of Clinical Virology        | 1/1/2001 | 12/31/2005 | Korea   | 10028 | 366 | 0 | 0 | 0 | other  | Unknown    | LMD       | 1 |
| 58 | Huh       | 2009 | Viral etiology and incidence associated with acute gastroenteritis in a 5-year survey in Gyeonggi province, South Korea            | Journal of Clinical Virology        | 1/1/2001 | 12/31/2005 | Korea   | 366   | 225 | 0 | 0 | 0 | under5 | Unknown    | LMD       | 1 |
| 59 | Huhti     | 2011 | Norovirus GI-4 Causes a More Severe Gastroenteritis Than Other Noroviruses in Young Children                                       | Journal of Infectious Diseases      | 7/1/2000 | 6/1/2002   | Finland | 485   | 128 | 0 | 0 | 0 | under5 | Unknown    | Developed | 0 |
| 60 | Huhulescu | 2009 | Etiology of Acute Gastroenteritis in Three Sentinel General Practices, Austria 2007                                                | Infection                           | 1/1/2007 | 12/31/2007 | Austria | 306   | 27  | 0 | 0 | 0 | other  | Outpatient | Developed | 0 |
| 61 | Jakab     | 2010 | Epidemiological and clinical characterization of norovirus infections among hospitalized children in Baranya County, Hungary       | Journal of Clinical Virology        | 5/1/2003 | 5/1/2005   | Hungary | 449   | 29  | 0 | 0 | 0 | other  | Inpatient  | Developed | 0 |
| 62 | Jalilian  | 2012 | Relative Frequency of Norovirus Infection in Children Suffering From Gastroenteritis and Referred to Aboozar Hospital, Ahvaz, Iran | Jundishapur Journal of Microbiology | 1/1/2008 | 12/31/2009 | Iran    | 143   | 9   | 0 | 0 | 0 | under5 | Inpatient  | LMD       | 0 |
| 63 | Jansen    | 2008 | Aetiology of community-acquired, acute gastroenteritis in hospitalised adults: a prospective cohort study                          | BMC Infectious Diseases             | 8/1/2005 | 8/1/2007   | Germany | 104   | 18  | 0 | 0 | 0 | over5  | Inpatient  | Developed | 1 |
| 64 | Jim       | 2008 | Emergence of the GI/4/2006b Variant and Recombinant Noroviruses in China                                                           | Journal of Medical Virology         | 2/1/2006 | 1/31/2007  | China   | 1110  | 114 | 0 | 0 | 0 | under5 | Inpatient  | LMD       | 1 |

|    |                      |      |                                                                                                                                                         |                                                                   |          |            |          |      |     |     |    |   |        |            |           |   |
|----|----------------------|------|---------------------------------------------------------------------------------------------------------------------------------------------------------|-------------------------------------------------------------------|----------|------------|----------|------|-----|-----|----|---|--------|------------|-----------|---|
| 65 | Jin                  | 2009 | Viral agents associated with acute gastroenteritis in children hospitalized with diarrhea in Lanzhou, China                                             | Journal of Clinical Virology                                      | 7/1/2005 | 6/1/2007   | China    | 544  | 50  | 0   | 0  | 0 | under5 | Inpatient  | LMD       | 1 |
| 66 | Junquera             | 2009 | Prevalence and Clinical Characteristics of Norovirus Gastroenteritis Among Hospitalized Children in Spain                                               | The Pediatric Infectious Disease Journal                          | 1/1/2005 | 1/1/2008   | Spain    | 352  | 61  | 0   | 0  | 0 | under5 | Inpatient  | Developed | 1 |
| 67 | Kamel                | 2009 | Predominance and Circulation of Enteric Viruses in the Region of Greater Cairo, Egypt                                                                   | Journal of Clinical Microbiology                                  | 3/1/2006 | 2/1/2007   | Egypt    | 230  | 62  | 0   | 0  | 0 | other  | Outpatient | LMD       | 1 |
| 68 | Kaplan               | 2011 | Detection and molecular characterisation of rotavirus and norovirus infections in Jordanian children with acute gastroenteritis                         | Archives of Virology                                              | 1/1/2006 | 12/31/2007 | Jordan   | 368  | 42  | 0   | 0  | 0 | other  | Inpatient  | LMD       | 1 |
| 69 | Karsten              | 2009 | Incidence and risk factors for community-acquired acute gastroenteritis in north-west Germany in 2004                                                   | European Journal of Clinical Microbiology and Infectious Diseases | 1/1/2004 | 12/31/2004 | Germany  | 1053 | 168 | 532 | 18 | 0 | other  | Outpatient | Developed | 0 |
| 70 | Khamrin, P., et al., | 2007 | Genetic diversity of noroviruses and sapoviruses in children hospitalized with acute gastroenteritis in Chiang Mai, Thailand.                           | J Med Virol                                                       | 3/1/2002 | 12/1/2004  | Thailand | 248  | 35  | 0   | 0  | 0 | under5 | Inpatient  | LMD       | 1 |
| 71 | Khamrin              | 2010 | Emergence of New Norovirus Variants and Genetic Heterogeneity of Noroviruses and Sapoviruses in Children Admitted to Hospital With Diarrhea in Thailand | Journal of Medical Virology                                       | 1/1/2005 | 12/31/2005 | Thailand | 147  | 10  | 0   | 0  | 0 | under5 | Inpatient  | LMD       | 0 |

|    |          |      |                                                                                                                                                                                                      |                                            |           |            |           |      |     |   |   |   |        |            |           |   |
|----|----------|------|------------------------------------------------------------------------------------------------------------------------------------------------------------------------------------------------------|--------------------------------------------|-----------|------------|-----------|------|-----|---|---|---|--------|------------|-----------|---|
| 72 | Kim      | 2014 | Molecular epidemiologic trends of diarrhea causing virus infection form clinica specimens in cheonan korea 2010-2012                                                                                 | Journal of Clinical Laboratory Analysis    | 7/1/2010  | 10/1/2012  | Korea     | 276  | 132 | 0 | 0 | 0 | other  | Inpatient  | LMD       | 0 |
| 73 | Kirby    | 2011 | Rotavirus and norovirus infections in children in Sana'a, Yemen                                                                                                                                      | Tropical Medicine and International Health | 11/1/2007 | 3/1/2009   | Yemen     | 290  | 30  | 0 | 0 | 0 | under5 | Unknown    | HMD       | 0 |
| 74 | Kirkwood | 2005 | A 5-year study of the prevalence and genetic diversity of human caliciviruses associated with sporadic cases of acute gastroenteritis in young children admitted to hospital in Melbourne, Australia | J Med Virol                                | 1/1/1998  | 12/31/2002 | Australia | 1233 | 108 | 0 | 0 | 0 | under5 | Inpatient  | Developed | 0 |
| 75 | Kittigul | 2010 | Norovirus GII-4 2006b Variant Circulating in Patients With Acute Gastroenteritis in Thailand During a 2006D2007 Study                                                                                | Journal of Medical Virology                | 1/1/2006  | 2/1/2007   | Thailand  | 158  | 73  | 0 | 0 | 0 | over5  | Unknown    | LMD       | 1 |
| 75 | Kittigul | 2010 | Norovirus GII-4 2006b Variant Circulating in Patients With Acute Gastroenteritis in Thailand During a 2006D2007 Study                                                                                | Journal of Medical Virology                | 1/1/2006  | 2/1/2007   | Thailand  | 75   | 35  | 0 | 0 | 0 | other  | Outpatient | LMD       | 1 |
| 75 | Kittigul | 2010 | Norovirus GII-4 2006b Variant Circulating in Patients With Acute Gastroenteritis in Thailand During a 2006D2007 Study                                                                                | Journal of Medical Virology                | 1/1/2006  | 2/1/2007   | Thailand  | 115  | 49  | 0 | 0 | 0 | under5 | Unknown    | LMD       | 1 |
| 75 | Kittigul | 2010 | Norovirus GII-4 2006b Variant Circulating in Patients With Acute Gastroenteritis in Thailand During a 2006D2007 Study                                                                                | Journal of Medical Virology                | 1/1/2006  | 2/1/2007   | Thailand  | 198  | 87  | 0 | 0 | 0 | other  | Inpatient  | LMD       | 1 |

|    |              |      |                                                                                                                                                |                                                 |           |      |     |   |   |   |        |            |           |   |
|----|--------------|------|------------------------------------------------------------------------------------------------------------------------------------------------|-------------------------------------------------|-----------|------|-----|---|---|---|--------|------------|-----------|---|
| 76 | Kittigul     | 2009 | Molecular Characterization of Rotaviruses, Noroviruses, Sapovirus, and Adenoviruses in Patients With Acute Gastroenteritis in Thailand         | Journal of Medical Virology                     | Thailand  | 156  | 4   | 0 | 0 | 0 | over5  | Inpatient  | LMD       | 1 |
| 76 | Kittigul     | 2009 | Molecular Characterization of Rotaviruses, Noroviruses, Sapovirus, and Adenoviruses in Patients With Acute Gastroenteritis in Thailand         | Journal of Medical Virology                     | Thailand  | 106  | 13  | 0 | 0 | 0 | under5 | Inpatient  | LMD       | 1 |
| 77 | Koh          | 2008 | Coinfection of Viral Agents in Korean Children with Acute Watery Diarrhea                                                                      | Journal of Korean Medical Science               | Korea     | 155  | 56  | 0 | 0 | 0 | other  | Inpatient  | LMD       | 0 |
| 78 | Koo          | 2012 | Noroviruses- The most common pediatric viral enteric pathogen at a large university hospital after introduction of rotavirus vaccination       | Journal of Pediatric Infectious Disease Society | USA       | 3222 | 353 | 0 | 0 | 0 | other  | Inpatient  | Developed | 1 |
| 79 | Lai          | 2011 | Gastroenteritis in a Taipei emergency department: aetiology and risk factors                                                                   | Clinical Microbiology and Infection             | Taiwan    | 335  | 108 | 0 | 0 | 0 | over5  | Inpatient  | LMD       | 1 |
| 80 | Lau (part I) | 2004 | High rate and changing molecular epidemiology pattern of norovirus infections in sporadic cases and outbreaks of gastroenteritis in Hong Kong. | J Med Virol 73                                  | Hong Kong | 240  | 24  | 0 | 0 | 0 | over5  | Inpatient  | Developed | 0 |
| 80 | Lau (part I) | 2004 | High rate and changing molecular epidemiology pattern of norovirus infections in sporadic cases and outbreaks of gastroenteritis in Hong Kong. | J Med Virol 73                                  | Hong Kong | 906  | 77  | 0 | 0 | 0 | over5  | Outpatient | Developed | 0 |

|    |                    |      |                                                                                                                                                |                                                     |           |            |             |      |      |     |   |   |        |            |           |   |
|----|--------------------|------|------------------------------------------------------------------------------------------------------------------------------------------------|-----------------------------------------------------|-----------|------------|-------------|------|------|-----|---|---|--------|------------|-----------|---|
| 80 | Lau (part I)       | 2004 | High rate and changing molecular epidemiology pattern of norovirus infections in sporadic cases and outbreaks of gastroenteritis in Hong Kong. | J Med Virol 73                                      | 7/1/2001  | 6/1/2002   | Hong Kong   | 495  | 99   | 0   | 0 | 0 | under5 | Impatient  | Developed | 0 |
| 80 | Lau (part I)       | 2004 | High rate and changing molecular epidemiology pattern of norovirus infections in sporadic cases and outbreaks of gastroenteritis in Hong Kong. | J Med Virol 73                                      | 7/1/2001  | 6/1/2002   | Hong Kong   | 89   | 15   | 0   | 0 | 0 | under5 | Outpatient | Developed | 0 |
| 81 | Lee, J.I., et al., | 2007 | Detection of human bocavirus in children hospitalized because of acute gastroenteritis.                                                        | J Infect Dis                                        | 1/1/2005  | 12/31/2006 | South Korea | 962  | 132  | 0   | 0 | 0 | under5 | Impatient  | LMD       | 0 |
| 82 | Lee                | 2009 | Surveillance of Acute Gastroenteritis in Seoul, Korea, During May 2004 and June 2007                                                           | Journal of Bacteriology and Virology                | 5/1/2004  | 6/1/2007   | Korea       | 6788 | 1282 | 0   | 0 | 0 | other  | Impatient  | LMD       | 1 |
| 83 | Leung              | 2010 | Establishment of public norovirus genome database in Hong Kong                                                                                 | Hong Kong Medical Journal                           | 12/1/2004 | 11/1/2006  | China       | 687  | 90   | 0   | 0 | 0 | other  | Impatient  | LMD       | 0 |
| 84 | Levidiotou         | 2009 | Viral agents of acute gastroenteritis in hospitalized children in Greece                                                                       | Clinical Microbiology and Infection                 | 1/1/2000  | 12/31/2006 | Greece      | 4604 | 185  | 0   | 0 | 0 | under5 | Impatient  | Developed | 1 |
| 85 | Li                 | 2012 | [Molecular and epidemiological study on among children under 5 years old in Nanjing]                                                           | Chinese Journal of Experimental & Clinical Virology | 7/1/2010  | 6/1/2011   | China       | 428  | 58   | 428 | 8 | 8 | under5 | Impatient  | LMD       | 0 |
| 86 | Liao               | 2011 | The characterization of novovirus genotypes in children in Chongqing                                                                           | Journal of Chongqing Medical University             | 8/1/2008  | 7/1/2009   | China       | 806  | 251  | 0   | 0 | 0 | other  | Unknown    | LMD       | 0 |
| 87 | Lim                | 2013 | Molecular epidemiology of norovirus in singapore- 2004-2011                                                                                    | Journal of Medical Virology                         | 9/1/2004  | 2/1/2011   | Singapore   | 1060 | 312  | 0   | 0 | 0 | other  | Impatient  | Developed | 1 |



|    |        |      |                                                                                                                                                          |                                                                   |           |            |           |     |     |   |   |   |        |           |           |   |
|----|--------|------|----------------------------------------------------------------------------------------------------------------------------------------------------------|-------------------------------------------------------------------|-----------|------------|-----------|-----|-----|---|---|---|--------|-----------|-----------|---|
| 88 | Lin    | 2012 | Detection and typing assay of norovirus in acute hospitalizations among children less than 5 years old from 2008 to 2009 in Lulong, Hebei province       | Chinese J Exp Clin Virol                                          | 10/1/2008 | 8/31/2009  | China     | 325 | 37  | 0 | 0 | 0 | under5 | Inpatient | LMD       | 0 |
| 89 | Liu    | 2013 | Molecular epidemiological survey on seven viral pathogens in children with diarrhea disease in Urumqi area in 2011                                       | Chin J Microbiol Immunol                                          | 1/1/2011  | 12/31/2011 | China     | 315 | 38  | 0 | 0 | 0 | under5 | Unknown   | LMD       | 0 |
| 90 | Liu    | 2010 | Identification of Norovirus as the Top Enteric Viruses Detected in Adult Cases with Acute Gastroenteritis                                                | The American Journal of Tropical Medicine and Hygiene             | 7/1/2007  | 6/1/2008   | China     | 557 | 148 | 0 | 0 | 0 | over5  | Inpatient | LMD       | 0 |
| 91 | Lorrot | 2011 | Epidemiology and clinical features of gastroenteritis in hospitalised children: prospective survey during a 2-year period in a Parisian hospital, France | European Journal of Clinical Microbiology and Infectious Diseases | 11/1/2001 | 5/1/2004   | France    | 23  | 2   | 0 | 0 | 0 | over5  | Inpatient | Developed | 1 |
| 91 | Lorrot | 2011 | Epidemiology and clinical features of gastroenteritis in hospitalised children: prospective survey during a 2-year period in a Parisian hospital, France | European Journal of Clinical Microbiology and Infectious Diseases | 11/1/2001 | 5/1/2004   | France    | 434 | 46  | 0 | 0 | 0 | under5 | Inpatient | Developed | 1 |
| 92 | Mahar  | 2011 | Characterization of Norovirus Strains in Australian Children From 2006 to 2008: Prevalence of Recombinant Strains                                        | Journal of Medical Virology                                       | 4/1/2006  | 12/1/2008  | Australia | 272 | 86  | 0 | 0 | 0 | other  | Inpatient | Developed | 1 |

|    |          |      |                                                                                                                                                  |                                                       |          |            |              |      |     |   |   |   |   |   |   |   |   |   |           |           |   |
|----|----------|------|--------------------------------------------------------------------------------------------------------------------------------------------------|-------------------------------------------------------|----------|------------|--------------|------|-----|---|---|---|---|---|---|---|---|---|-----------|-----------|---|
| 93 | Malasao  | 2008 | Genetic Diversity of Norovirus, Sapovirus, and Astrovirus Isolated From Children Hospitalized With Acute Gastroenteritis in Chiang Mai, Thailand | Journal of Medical Virology                           | 5/1/2000 | 3/1/2002   | Thailand     | 296  | 24  | 0 | 0 | 0 | 0 | 0 | 0 | 0 | 0 | 0 | Inpatient | LMD       | 0 |
| 94 | Mans     | 2010 | Emerging norovirus GII.4 2008 variant detected in hospitalised paediatric patients in South Africa                                               | Journal of Clinical Virology                          | 1/1/2008 | 12/31/2008 | South Africa | 245  | 35  | 0 | 0 | 0 | 0 | 0 | 0 | 0 | 0 | 0 | Inpatient | HMD       | 0 |
| 95 | Mans     | 2014 | Human caliciviruses detected in HIV seropositive children in kenya                                                                               | Journal of Medical Virology                           | 2/1/1999 | 6/1/2000   | Kenya        | 105  | 18  | 0 | 0 | 0 | 0 | 0 | 0 | 0 | 0 | 0 | Community | HMD       | 0 |
| 96 | Manso    | 2013 | Role of norovirus in acute gastroenteritis in northwest of spain during 2010-2011                                                                | Journal of Medical Virology                           | 7/1/2010 | 6/1/2011   | Spain        | 1093 | 322 | 0 | 0 | 0 | 0 | 0 | 0 | 0 | 0 | 0 | Inpatient | Developed | 0 |
| 96 | Manso    | 2013 | Role of norovirus in acute gastroenteritis in northwest of spain durin 2010-2011                                                                 | Journal of Medical Virology                           | 7/1/2010 | 6/1/2011   | Spain        | 1550 | 425 | 0 | 0 | 0 | 0 | 0 | 0 | 0 | 0 | 0 | Inpatient | Developed | 0 |
| 96 | Manso    | 2013 | Role of norovirus in acute gastroenteritis in northwest of spain durin 2010-2011                                                                 | Journal of Medical Virology                           | 7/1/2010 | 6/1/2011   | Spain        | 2643 | 747 | 0 | 0 | 0 | 0 | 0 | 0 | 0 | 0 | 0 | Inpatient | Developed | 0 |
| 97 | Marshall | 2003 | Incidence and characteristics of endemic Norwalk-like virus-associated gastroenteritis.                                                          | J Med Virol                                           | 9/1/1997 | 2/1/1999   | Australia    | 638  | 73  | 0 | 0 | 0 | 0 | 0 | 0 | 0 | 0 | 0 | Community | Developed | 0 |
| 98 | Maslin   | 2008 | Detection and Characterization of Human Caliciviruses Associated with Sporadic Acute Diarrhea in Adults in Djibouti (Horn of Africa)             | The American Journal of Tropical Medicine and Hygiene | 9/1/2002 | 2/1/2004   | Djibouti     | 75   | 14  | 0 | 0 | 0 | 0 | 0 | 0 | 0 | 0 | 0 | Inpatient | HMD       | 1 |
| 99 | Mason    | 2013 | Campylobacter infection in children in malawi is common and is frequently associated with enteric virus co-infections                            | PLoS ONE [Electronic Resource]                        | 7/1/1997 | 6/1/2007   | Malawi       | 1659 | 192 | 0 | 0 | 0 | 0 | 0 | 0 | 0 | 0 | 0 | Inpatient | HMD       | 1 |

|     |                     |      |                                                                                                                                                             |                                                   |           |            |          |      |     |     |   |   |        |           |           |   |
|-----|---------------------|------|-------------------------------------------------------------------------------------------------------------------------------------------------------------|---------------------------------------------------|-----------|------------|----------|------|-----|-----|---|---|--------|-----------|-----------|---|
| 99  | Mason               | 2013 | Campylobacter infection in children in malawi is common and is frequently associated with enteric virus co-infections                                       | PLoS ONE [Electronic Resource]                    | 7/1/1997  | 6/1/2007   | Malawi   | 282  | 20  | 0   | 0 | 0 | other  | Inpatient | HMD       | 1 |
| 100 | Mattison            | 2010 | Molecular Detection and Characterization of Noroviruses From Children in Botswana                                                                           | Journal of Medical Virology                       | 1/1/2000  | 12/31/2006 | Botswana | 74   | 16  | 26  | 8 | 8 | other  | Inpatient | HMD       | 1 |
| 101 | Medici              | 2012 | Molecular Detection and Epidemiology of Astrovirus, Bocavirus, and Sapovirus in Italian Children Admitted to Hospital With Acute Gastroenteritis, 2008-2009 | Journal of Medical Virology                       | 1/1/2008  | 12/31/2009 | Italy    | 1137 | 214 | 0   | 0 | 0 | other  | Inpatient | Developed | 0 |
| 102 | Zeng (Mei)          | 2011 | Prevalence and Genetic Diversity of Norovirus in Outpatient Children with Acute Diarrhea in Shanghai, China                                                 | Japanese Journal of Infectious Diseases           | 8/1/2008  | 7/1/2009   | China    | 910  | 165 | 0   | 0 | 0 | other  | Inpatient | LMD       | 0 |
| 103 | Menon               | 2013 | Norovirus genogroup II gastroenteritis in hospitalized children in south india                                                                              | American Journal of Tropical Medicine and Hygiene | 1/1/2005  | 1/1/2006   | India    | 282  | 28  | 0   | 0 | 0 | under5 | Inpatient | HMD       | 0 |
| 104 | Monica, B., et al., | 2007 | Human caliciviruses in symptomatic and asymptomatic infections in children in Vellore, South India.                                                         | J Med Virol                                       | 12/1/2001 | 12/1/2004  | India    | 500  | 38  | 173 | 7 | 7 | under5 | Community | HMD       | 1 |
| 104 | Monica, B., et al., | 2007 | Human caliciviruses in symptomatic and asymptomatic infections in children in Vellore, South India.                                                         | J Med Virol                                       | 12/1/2001 | 12/1/2004  | India    | 350  | 53  | 0   | 0 | 0 | under5 | Inpatient | HMD       | 1 |
| 105 | Muhsen              | 2013 | Incidence and characteristics of sporadic norovirus gastroenteritis associated with hospitalization of children less than 5 years of age in Isarel          | The Pediatric Infectious Disease Journal          | 11/1/2007 | 12/1/2010  | Isarel   | 515  | 89  | 0   | 0 | 0 | under5 | Inpatient | Developed | 0 |

|     |           |      |                                                                                                                                                                         |                                |           |            |            |      |     |     |    |        |            |           |   |
|-----|-----------|------|-------------------------------------------------------------------------------------------------------------------------------------------------------------------------|--------------------------------|-----------|------------|------------|------|-----|-----|----|--------|------------|-----------|---|
| 106 | My        | 2013 | Endemic norovirus infections in children, ho chi minh city, vietnam 2009-2010                                                                                           | Emerg Infect Dis               | 5/1/2009  | 12/1/2010  | Vietnam    | 1419 | 241 | 609 | 15 | under5 | Impatient  | LMD       | 0 |
| 107 | Nahar     | 2013 | High prevalence of noroviruses among hospitalized diarrheal patients in Bangladesh, 2011                                                                                | J Infect Dev Ctries            | 1/1/2011  | 12/31/2011 | Bangladesh | 257  | 73  | 0   | 0  | other  | Impatient  | HMD       | 0 |
| 108 | Nakanishi | 2009 | Detection of enteric viruses in rectal swabs from children with acute gastroenteritis attending the pediatric outpatient clinics in Sapporo, Japan                      | Journal of Clinical Virology   | 12/1/2003 | 12/31/2005 | Japan      | 877  | 116 | 0   | 0  | other  | Outpatient | Developed | 0 |
| 109 | Nayak     | 2009 | A new variant of Norovirus GI.4/2007 and inter-genotype recombinant strains of NVGII causing acute watery diarrhoea among children in Kolkata, India                    | Journal of Clinical Virology   | 7/1/2006  | 9/1/2007   | India      | 111  | 21  | 0   | 0  | under5 | Outpatient | HMD       | 1 |
| 110 | Neesanant | 2013 | Optimization of one-step real-time reverse transcription-polymerase chain reaction assays for norovirus detection and molecular epidemiology of noroviruses in Thailand | Journal of Virological Methods | 1/1/2005  | 11/30/2006 | Thailand   | 500  | 119 | 441 | 30 | under5 | Impatient  | LMD       | 0 |
| 111 | Nguyen    | 2008 | Norovirus and Sapovirus Infections among Children with Acute Gastroenteritis in Ho Chi Minh City during 2005D2006                                                       | Journal of Tropical Pediatrics | 12/1/2005 | 11/1/2006  | China      | 502  | 32  | 0   | 0  | other  | Impatient  | LMD       | 0 |
| 112 | Oh        | 2003 | Viral agents of acute gastroenteritis in German children: prevalence and molecular diversity.                                                                           | J Med Virol                    | 2/1/2001  | 1/1/2002   | Germany    | 217  | 45  | 50  | 2  | other  | Impatient  | Developed | 0 |

|     |                           |      |                                                                                                              |                                                 |           |            |            |       |      |    |   |   |   |        |           |           |   |
|-----|---------------------------|------|--------------------------------------------------------------------------------------------------------------|-------------------------------------------------|-----------|------------|------------|-------|------|----|---|---|---|--------|-----------|-----------|---|
| 113 | Omishi                    | 2008 | Molecular epidemiology of norovirus gastroenteritis in Soma, Japan, 2001D2003                                | Pediatrics International                        | 9/1/2001  | 8/1/2003   | Japan      | 515   | 66   | 0  | 0 | 0 | 0 | other  | Inpatient | Developed | 1 |
| 114 | Ouyang                    | 2012 | Etiology and epidemiology of viral diarrhea in children under the age of five hospitalized in Tianjin, China | Archives of Virology                            | 4/1/2008  | 4/1/2009   | China      | 766   | 64   | 0  | 0 | 0 | 0 | under5 | Inpatient | LMD       | 0 |
| 115 | Ozkul                     | 2011 | Frequency and phylogeny of norovirus in diarrhetic children in Istanbul, Turkey                              | Journal of Clinical Virology                    | 4/1/2008  | 8/1/2009   | Turkey     | 238   | 36   | 0  | 0 | 0 | 0 | other  | Inpatient | Developed | 0 |
| 116 | Pang                      | 1999 | Human caliciviruses-associated sporadic GE in Finnish < 2 during RV trial                                    | PIDJ                                            | 9/1/1993  | 6/1/1995   | Finland    | 1477  | 313  | 47 | 0 | 0 | 0 | under5 | Community | Developed | 0 |
| 117 | Papaventis, D.C., et al., | 2007 | Norovirus infection in children with acute gastroenteritis, Madagascar, 2004-2005.                           | Emerg Infect Dis                                | 5/1/2004  | 5/1/2005   | Madagascar | 237   | 14   | 0  | 0 | 0 | 0 | other  | Inpatient | HMD       | 0 |
| 118 | Park                      | 2012 | Updates on the genetic variations of Norovirus in sporadic gastroenteritis in Chungnam Korea, 2009.          | Virology Journal                                | 1/1/2008  | 12/31/2010 | Korea      | 2257  | 295  | 0  | 0 | 0 | 0 | under5 | Inpatient | LMD       | 0 |
| 118 | Park                      | 2012 | Updates on the genetic variations of Norovirus in sporadic gastroenteritis in Chungnam Korea, 2009.          | Virology Journal                                | 1/1/2008  | 12/31/2010 | Korea      | 2382  | 96   | 0  | 0 | 0 | 0 | over5  | Inpatient | LMD       | 0 |
| 119 | Park                      | 2012 | Characterization of norovirus infections in Seoul, Korea                                                     | Microbiology and Immunology Clinical Laboratory | 3/1/2008  | 3/31/2011  | Korea      | 7002  | 710  | 0  | 0 | 0 | 0 | other  | Inpatient | LMD       | 0 |
| 120 | Park                      | 2011 | Viral Agents Associated with Acute Gastroenteritis in Seoul, Korea                                           | NEJM                                            | 2/1/2004  | 12/1/2008  | Korea      | 10603 | 1845 | 0  | 0 | 0 | 0 | under5 | Inpatient | LMD       | 1 |
| 121 | Payne                     | 2013 | Norovirus and Medically Attended Gastroenteritis in US Children                                              | NEJM                                            | 10/1/2008 | 9/30/2010  | USA        | 514   | 86   | 0  | 0 | 0 | 0 | under5 | Inpatient | Developed | 0 |

|     |           |      |                                                                                                                                          |                                |           |            |              |      |     |   |   |   |   |        |            |           |   |
|-----|-----------|------|------------------------------------------------------------------------------------------------------------------------------------------|--------------------------------|-----------|------------|--------------|------|-----|---|---|---|---|--------|------------|-----------|---|
| 121 | Payne     | 2013 | Norovirus and Medically Attended Gastroenteritis in US Children                                                                          | NEJM                           | 10/1/2008 | 9/30/2010  | USA          | 595  | 139 | 0 | 0 | 0 | 0 | under5 | Impatient  | Developed | 0 |
| 121 | Payne     | 2013 | Norovirus and Medically Attended Gastroenteritis in US Children                                                                          | NEJM                           | 10/1/2008 | 9/30/2010  | USA          | 186  | 53  | 0 | 0 | 0 | 0 | under5 | Outpatient | Developed | 0 |
| 122 | Phan      | 2006 | Changing distribution of norovirus genotypes and genetic analysis of recombinant GIIb among infants and children with diarrhea in Japan. | J Med Virol                    | 7/1/2003  | 6/1/2004   | Japan        | 402  | 58  | 0 | 0 | 0 | 0 | other  | Outpatient | Developed | 0 |
| 123 | Phan      | 2005 | Viral Diarrhea in Japanese Children: Results from a One-Year Epi Study                                                                   | Clin Lab                       | 7/1/2002  | 6/1/2003   | Japan        | 557  | 106 | 0 | 0 | 0 | 0 | other  | Outpatient | Developed | 1 |
| 124 | Phan      | 2006 | Detection and Genetic Characterization of NoV Strains circulating among Infants and children with AGE in Japan during 2004-2005          | Clin Lab.                      | 7/1/2004  | 6/1/2005   | Japan        | 752  | 139 | 0 | 0 | 0 | 0 | other  | Outpatient | Developed | 0 |
| 125 | Phan      | 2012 | Acute Diarrhea in West African Children: Diverse Enteric Viruses and a Novel Parvovirus Genus                                            | Journal of Virology            | 11/1/2008 | 2/28/2010  | Burkina Faso | 49   | 7   | 0 | 0 | 0 | 0 | under5 | Unknown    | HMD       | 0 |
| 126 | Podkolzin | 2009 | Hospital-based surveillance of rotavirus and other viral agents of diarrhea in children and adults in Russia, 2005-2007                  | Journal of Infectious Diseases | 1/1/2005  | 12/31/2007 | Russia       | 1354 | 161 | 0 | 0 | 0 | 0 | overs  | Impatient  | Developed | 1 |
| 126 | Podkolzin | 2009 | Hospital-based surveillance of rotavirus and other viral agents of diarrhea in children and adults in Russia, 2005-2007                  | Journal of Infectious Diseases | 1/1/2005  | 12/31/2007 | Russia       | 2848 | 356 | 0 | 0 | 0 | 0 | under5 | Impatient  | Developed | 1 |

|     |            |      |                                                                                                                      |                                                                   |           |            |            |      |      |   |   |   |   |   |        |            |           |   |
|-----|------------|------|----------------------------------------------------------------------------------------------------------------------|-------------------------------------------------------------------|-----------|------------|------------|------|------|---|---|---|---|---|--------|------------|-----------|---|
| 127 | Puustinen  | 2012 | Norovirus genotypes in endemic acute gastroenteritis of infants and children in Finland between 1994 and 2007        | Epidemiology & Infection                                          | 1/1/1993  | 12/31/2007 | Finland    | 4727 | 1172 | 0 | 0 | 0 | 0 | 0 | under5 | Community  | Developed | 1 |
| 128 | Puustinen  | 2011 | Noroviruses as a major cause of acute gastroenteritis in children in Finland, 2009-2010                              | Scandinavian Journal of Infectious Diseases                       | 9/1/2009  | 8/1/2010   | Finland    | 195  | 49   | 0 | 0 | 0 | 0 | 0 | other  | Unknown    | Developed | 0 |
| 129 | Rachakonda | 2008 | Genetic diversity of noroviruses and sapoviruses in children with acute sporadic gastroenteritis in New Delhi, India | Journal of Clinical Virology                                      | 1/1/2001  | 12/31/2001 | India      | 226  | 36   | 0 | 0 | 0 | 0 | 0 | other  | Outpatient | HMD       | 0 |
| 130 | Rahman     | 2010 | Molecular detection of noroviruses in hospitalized patients in Bangladesh                                            | European Journal of Clinical Microbiology and Infectious Diseases | 1/1/2004  | 12/31/2005 | Bangladesh | 189  | 37   | 0 | 0 | 0 | 0 | 0 | other  | Inpatient  | HMD       | 0 |
| 131 | Rahman     | 2013 | Norovirus Variant GII.4/Sydney/2012, Bangladesh                                                                      | Emerging Infectious Diseases                                      | 12/1/2011 | 12/31/2012 | Bangladesh | 795  | 254  | 0 | 0 | 0 | 0 | 0 | other  | Inpatient  | HMD       | 0 |
| 132 | Ramirez    | 2009 | Emerging GII.4 norovirus variants affect children with diarrhea in Palermo, Italy in 2006                            | Journal of Medical Virology                                       | 1/1/2005  | 12/31/2006 | Italy      | 465  | 97   | 0 | 0 | 0 | 0 | 0 | under5 | Inpatient  | Developed | 0 |
| 133 | Rasanen    | 2011 | Noroviruses in children seen in a hospital for acute gastroenteritis in Finland                                      | European Journal of Pediatrics                                    | 9/1/2006  | 8/1/2008   | Finland    | 759  | 196  | 0 | 0 | 0 | 0 | 0 | other  | Inpatient  | Developed | 1 |
| 134 | Ribeiro    | 2008 | Hospitalization due to norovirus and genotypes of pediatric patients, state of Espirito Santo                        | Memórias do Instituto Oswaldo Cruz                                | 7/1/2004  | 11/1/2006  | Brazil     | 68   | 27   | 0 | 0 | 0 | 0 | 0 | other  | Inpatient  | LMD       | 0 |
| 135 | Rimoldi    | 2011 | Epidemiological and clinical characteristics of pediatric gastroenteritis associated with new viral agents           | Archives of Virology                                              | 1/1/2008  | 10/1/2009  | Italy      | 154  | 25   | 0 | 0 | 0 | 0 | 0 | other  | Inpatient  | Developed | 0 |

|     |                  |      |                                                                                                                                                               |                                                |          |           |       |      |     |   |   |   |        |            |           |   |
|-----|------------------|------|---------------------------------------------------------------------------------------------------------------------------------------------------------------|------------------------------------------------|----------|-----------|-------|------|-----|---|---|---|--------|------------|-----------|---|
| 136 | Rivera           | 2011 | Norovirus prevalence in (pathogen negative <sup>v</sup> ) gastroenteritis in children from periurban areas in Lima                                            | Peru <sup>u</sup>                              | 9/1/2006 | 7/1/2008  | Peru  | 224  | 39  | 0 | 0 | 0 | unders | Community  | HMD       | 1 |
| 137 | Romani           | 2012 | Prevalence of Norovirus Infection in Children and Adults with Acute Gastroenteritis, Tehran, Iran, 2008-2009                                                  | Food and Environmental Virology                | 5/1/2008 | 5/1/2009  | Iran  | 293  | 26  | 0 | 0 | 0 | other  | Inpatient  | LMD       | 0 |
| 138 | Rovida           | 2013 | Molecular detection of gastrointestinal viral infections in hospitalized patients                                                                             | Diagnostic Microbiology and Infectious Disease | 4/1/2011 | 4/30/2012 | Italy | 689  | 53  | 0 | 0 | 0 | other  | Inpatient  | Developed | 0 |
| 139 | Sai              | 2013 | Epidemiology and clinical features of rotavirus and norovirus infection among children in Ji'nan, China                                                       | Virology Journal                               | 2/1/2011 | 1/31/2012 | China | 502  | 58  | 0 | 0 | 0 | unders | Outpatient | LMD       | 0 |
| 139 | Sai              | 2013 | Epidemiology and clinical features of rotavirus and norovirus infection among children in Ji'nan, China                                                       | Virology Journal                               | 2/1/2011 | 1/31/2012 | China | 265  | 22  | 0 | 0 | 0 | unders | Inpatient  | LMD       | 0 |
| 140 | Sai              | 2013 | Clinical and molecular epidemiology of norovirus infection in adults with acute gastroenteritis in Ji'nan, China                                              | Arch Virol                                     | 6/1/2010 | 5/31/2011 | China | 480  | 42  | 0 | 0 | 0 | overs  | Outpatient | LMD       | 0 |
| 141 | Saito            | 2014 | Multiple Norovirus Infections in a Birth Cohort in a Peruvian Periurban Community                                                                             | Clinical Infectious Diseases                   | 6/1/2007 | 4/30/2011 | Peru  | 1495 | 341 | 0 | 0 | 0 | unders | Community  | HMD       | 0 |
| 142 | Sanchez-Fauquier | 2011 | Global study of viral diarrhea in hospitalized children in Spain: Results of Structural Surveillance of Viral Gastroenteritis Net Work (VIGESS-net) 2006D2008 | Journal of Clinical Virology                   | 3/1/2006 | 3/1/2008  | Spain | 2048 | 547 | 0 | 0 | 0 | unders | Inpatient  | Developed | 1 |



|     |                            |      |                                                                                                                                                                                                                        |                                  |           |            |              |      |     |      |   |   |   |        |            |           |   |
|-----|----------------------------|------|------------------------------------------------------------------------------------------------------------------------------------------------------------------------------------------------------------------------|----------------------------------|-----------|------------|--------------|------|-----|------|---|---|---|--------|------------|-----------|---|
| 143 | Sanchez-Fauquier           | 2006 | Human RV G9 and G3 as Major Cause of Diarrhea in Hospitalized children, Spain                                                                                                                                          | EIDJ 2006; 12(10)1536-41         | 1/1/2005  | 1/1/2006   | Spain        | 656  | 79  | 0    | 0 | 0 | 0 | under5 | Inpatient  | Developed | 0 |
| 144 | Saupe                      | 2013 | Norovirus Surveillance among Callers to Foodborne Illness Complain Hotline, Minnesota, USA, 2011-2013                                                                                                                  | Emerging Infectious Diseases     | 10/1/2011 | 1/31/2013  | USA          | 241  | 127 | 0    | 0 | 0 | 0 | other  | Community  | Developed | 0 |
| 145 | Schnagl                    | 2000 | Prevalence and genomic variation of Norwalk-like viruses in central Australia in 1995-1997.                                                                                                                            | Acta Virol 44                    | 1/1/1995  | 12/31/1997 | Australia    | 360  | 9   | 0    | 0 | 0 | 0 | other  | Inpatient  | Developed | 0 |
| 146 | Sdiri-Loulizi              | 2009 | Molecular Epidemiology of Norovirus Gastroenteritis Investigated Using Samples Collected from Children in Tunisia during a Four-Year Period: Detection of the Norovirus Variant GGII.4 Hunter as Early as January 2003 | Journal of Clinical Microbiology | 1/1/2003  | 4/1/2007   | Tunisia      | 788  | 128 | 0    | 0 | 0 | 0 | other  | Unknown    | LMD       | 1 |
| 147 | Sdiri-Loulizi, K., et al., | 2008 | Acute infantile gastroenteritis associated with human enteric viruses in Tunisia.                                                                                                                                      | J Clin Microbiol                 | 1/1/2003  | 6/1/2005   | Tunisia      | 252  | 61  | 1233 | 5 | 0 | 0 | other  | Inpatient  | LMD       | 0 |
| 147 | Sdiri-Loulizi, K., et al., | 2008 | Acute infantile gastroenteritis associated with human enteric viruses in Tunisia.                                                                                                                                      | J Clin Microbiol                 | 1/1/2003  | 6/1/2005   | Tunisia      | 380  | 49  | 248  | 3 | 0 | 0 | other  | Outpatient | LMD       | 0 |
| 148 | Seo                        | 2012 | Prevalence of Viruses with Diarrhea among Hospitalized Children West Gyeonggi Province                                                                                                                                 | Korean J Pediatr Infect Dis      | 1/1/2009  | 12/31/2009 | Korea        | 310  | 1   | 0    | 0 | 0 | 0 | other  | Inpatient  | LMD       | 0 |
| 149 | Sukhrie                    | 2011 | Using Molecular Epidemiology To Trace Transmission of Nosocomial Norovirus Infection                                                                                                                                   | Journal of Clinical Microbiology | 7/1/2002  | 6/1/2007   | see comments | 2458 | 264 | 0    | 0 | 0 | 0 | other  | Inpatient  | Developed | 1 |

|     |              |      |                                                                                                                                                                                      |                                   |           |            |         |      |     |    |   |   |        |            |           |   |
|-----|--------------|------|--------------------------------------------------------------------------------------------------------------------------------------------------------------------------------------|-----------------------------------|-----------|------------|---------|------|-----|----|---|---|--------|------------|-----------|---|
| 150 | Takamashi    | 2009 | Detection, genetic characterization, and quantification of norovirus RNA from sera of children with gastroenteritis                                                                  | Journal of Clinical Virology      | 12/1/2005 | 12/1/2006  | Japan   | 56   | 39  | 0  | 0 | 0 | other  | Inpatient  | Developed | 0 |
| 151 | Tam          | 2012 | Changes in Causes of Acute Gastroenteritis in the United Kingdom Over 15 Years: Microbiologic Findings From 2 Prospective, Population-Based Studies of Infectious Intestinal Disease | Clinical Infectious Diseases      | 4/1/2008  | 8/1/2009   | UK      | 782  | 129 | 0  | 0 | 0 | other  | Community  | Developed | 0 |
| 152 | Tan          | 2010 | [Norovirus infection in adults with sporadic gastroenteritis during 2007-2008 in Nanning Municipal]                                                                                  | Zhongguo Jihua Mianyi             | 1/1/2007  | 12/31/2008 | China   | 696  | 183 | 0  | 0 | 0 | over5  | Outpatient | LMD       | 0 |
| 153 | Tang         | 2013 | Epidemiological and molecular analysis of human norovirus infections in Taiwan during 2011 and 2012                                                                                  | BMC Infectious Diseases           | 8/1/2011  | 7/31/2012  | Taiwan  | 155  | 17  | 98 | 7 | 0 | other  | Unknown    | LMD       | 0 |
| 154 | Thongprachum | 2014 | Molecular epidemiology of norovirus associated with gastroenteritis and emergence of norovirus GI.4 variant 2012 in Japanese pediatric patients                                      | Infection, Genetics and Evolution | 7/1/2009  | 6/30/2013  | Japan   | 2381 | 936 | 0  | 0 | 0 | other  | Outpatient | Developed | 0 |
| 155 | Tramor       | 2013 | Detection and Molecular Characterisation of Noroviruses in Hospitalised Children in Malawi, 1997-2007                                                                                | Journal of Medical Virology       | 7/1/1997  | 6/30/2007  | Malawi  | 1941 | 220 | 0  | 0 | 0 | under5 | Inpatient  | HMD       | 1 |
| 156 | Trang        | 2012 | Detection and Molecular Characterization of Noroviruses and Sapoviruses in Children Admitted to Hospital With Acute Gastroenteritis in Vietnam                                       | Journal of Medical Virology       | 11/1/2007 | 10/1/2008  | Vietnam | 501  | 180 | 0  | 0 | 0 | under5 | Inpatient  | LMD       | 0 |

|     |                            |                                                                                                                                                 |                                                   |           |            |              |      |     |   |   |   |        |           |           |   |
|-----|----------------------------|-------------------------------------------------------------------------------------------------------------------------------------------------|---------------------------------------------------|-----------|------------|--------------|------|-----|---|---|---|--------|-----------|-----------|---|
| 157 | Victoria, M., et al., 2007 | Prevalence and molecular epidemiology of noroviruses in hospitalized children with acute gastroenteritis in Rio de Janeiro, Brazil, 2004.       | Pediatr Infect Dis J                              | 1/1/2004  | 12/31/2004 | Brazil       | 318  | 65  | 0 | 0 | 0 | other  | Inpatient | LMD       | 0 |
| 158 | Wiegering 2011             | Gastroenteritis in childhood: a retrospective study of 650 hospitalized pediatric patients                                                      | International Journal of Infectious Diseases      | 4/1/2005  | 5/1/2008   | Germany      | 598  | 188 | 0 | 0 | 0 | other  | Inpatient | Developed | 1 |
| 159 | Wolfaardt 1997             | Incidence of human calicivirus and rotavirus infection in patients with gastroenteritis in South Africa                                         | Jo Med Virol                                      | 10/1/1991 | 10/1/1995  | South Africa | 1296 | 32  | 0 | 0 | 0 | other  | Inpatient | HMD       | 0 |
| 160 | Won 2013                   | Full-Genomic Analysis of a Human Norovirus Recombinant GII.12/13 Novel Strain Isolate from South Korea                                          | PLOS One                                          | 12/1/2004 | 11/30/2007 | South Korea  | 500  | 20  | 0 | 0 | 0 | under5 | Inpatient | LMD       | 1 |
| 161 | Xu 2009                    | Molecular Epidemiology of Norovirus Infection Among Children With Acute Gastroenteritis in Shanghai, China, 2001D2005                           | Journal of Medical Virology                       | 1/1/2001  | 12/31/2005 | China        | 484  | 45  | 0 | 0 | 0 | under5 | Inpatient | LMD       | 1 |
| 162 | Yang 2010                  | Epidemiology and Clinical Peculiarities of Norovirus and Rotavirus Infection in Hospitalized Young Children with Acute Diarrhea in Taiwan, 2009 | Journal of Microbiology, Immunology and Infection | 1/1/2009  | 12/31/2009 | Taiwan       | 989  | 144 | 0 | 0 | 0 | under5 | Inpatient | LMD       | 0 |
| 163 | Yao 2012                   | Pathogens causing viral diarrhea in children aged <=5 years in Xinhuang, Hunan, 2009-2011                                                       | Disease Surveillance                              | 1/1/2008  | 12/31/2011 | China        | 1063 | 94  | 0 | 0 | 0 | under5 | Inpatient | LMD       | 0 |

|     |                     |      |                                                                                                                                                                       |             |      |      |   |   |   |        |            |           |   |
|-----|---------------------|------|-----------------------------------------------------------------------------------------------------------------------------------------------------------------------|-------------|------|------|---|---|---|--------|------------|-----------|---|
| 164 | Yonenda             | 2014 | Epidemiological Characteristics of Norovirus Associated with Sporadic Gastroenteritis among Children from the 2006/2007 to 2011/2012 Season in Nara Prefecture, Japan | Japan       | 1159 | 274  | 0 | 0 | 0 | other  | Inpatient  | Developed | 1 |
| 165 | Yoon, J.S., et al., | 2008 | Molecular Epidemiology of Norovirus Infections in Children with Acute Gastroenteritis in South Korea, November 2005 through November 2006.                            | South Korea | 762  | 114  | 0 | 0 | 0 | under5 | Inpatient  | LMD       | 0 |
| 166 | Yu                  | 2011 | Molecular epidemiological survey on children with viral diarrhea in Tangshan                                                                                          | China       | 1100 | 258  | 0 | 0 | 0 | other  | Unknown    | LMD       | 0 |
| 167 | Zeng                | 2010 | [Epidemiological surveillance of norovirus and rotavirus diarrhea among outpatient children in five metropolitan cities]                                              | China       | 5091 | 1049 | 0 | 0 | 0 | other  | Outpatient | LMD       | 0 |
| 168 | Zeng                | 2012 | Clinical and Molecular Epidemiology of Norovirus Infection in Childhood Diarrhea in China                                                                             | China       | 317  | 81   | 0 | 0 | 0 | other  | Inpatient  | LMD       | 0 |
| 168 | Zeng                | 2012 | Clinical and Molecular Epidemiology of Norovirus Infection in Childhood Diarrhea in China                                                                             | China       | 4123 | 1067 | 0 | 0 | 0 | other  | Outpatient | LMD       | 0 |
| 169 | Zeng                | 2010 | Norovirus gastroenteritis in young children receiving human rotavirus vaccine                                                                                         | Finland     | 485  | 155  | 0 | 0 | 0 | under5 | Community  | Developed | 0 |
| 170 | Zhang               | 2012 | Surveillance of viral diarrhea in Shenzhen in 2010                                                                                                                    | China       | 925  | 186  | 0 | 0 | 0 | other  | Unknown    | LMD       | 0 |

|     |       |      |                                                                                                                                      |                                 |           |            |       |      |     |    |    |   |        |           |           |   |
|-----|-------|------|--------------------------------------------------------------------------------------------------------------------------------------|---------------------------------|-----------|------------|-------|------|-----|----|----|---|--------|-----------|-----------|---|
| 171 | Zhang | 2009 | Norovirus infection among diarrhea cases in Shenzhen, 2008                                                                           | Disease Surveillance            | 1/1/2008  | 12/31/2008 | China | 606  | 147 | 0  | 0  | 0 | other  | Unknown   | LMD       | 0 |
| 172 | Zhang | 2011 | Symptomatic and Asymptomatic Infections of Rotavirus, Norovirus, and Adenovirus Among Hospitalized Children in Xi'an, China          | Journal of Medical Virology     | 3/1/2009  | 5/1/2010   | China | 201  | 41  | 53 | 19 | 0 | under5 | Inpatient | LMD       | 0 |
| 173 | Zheng | 2013 | Detection of noroviruses from viral infectious diarrhea patients in Jiading, Shanghai                                                | Chinese Journal of Zoonoses     | 3/1/2008  | 2/28/2010  | China | 572  | 53  | 0  | 0  | 0 | other  | Inpatient | LMD       | 0 |
| 174 | Zhuge | 2011 | Detection and typing of caliciviruses from patients with acute diarrhea in Hangzhou area                                             | Chinese Journal of Epidemiology | 7/1/2009  | 8/31/2010  | China | 920  | 195 | 0  | 0  | 0 | other  | Unknown   | LMD       | 0 |
| 175 | Zintz | 2005 | Prevalence and genetic characterization of caliciviruses among children hospitalized for acute gastroenteritis in the United States. | Infect Genet Evol 5             | 11/1/1997 | 12/1/1999  | US    | 1840 | 131 | 0  | 0  | 0 | under5 | Inpatient | Developed | 0 |

Fig. S1A: All Studies, by Age

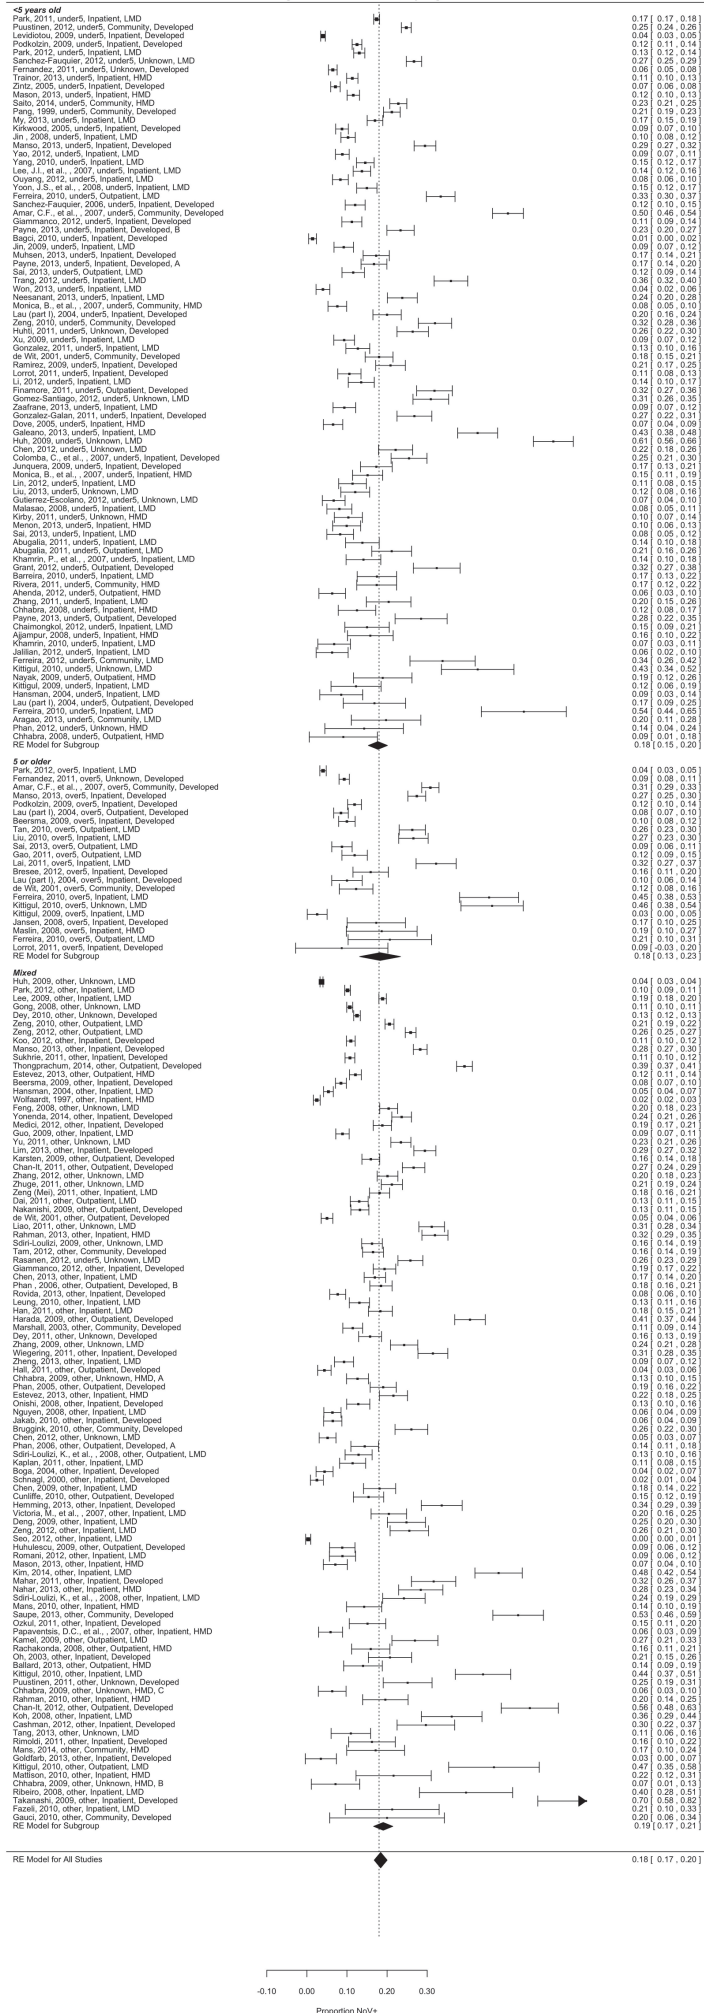

Fig. S1B: All Studies, by Setting

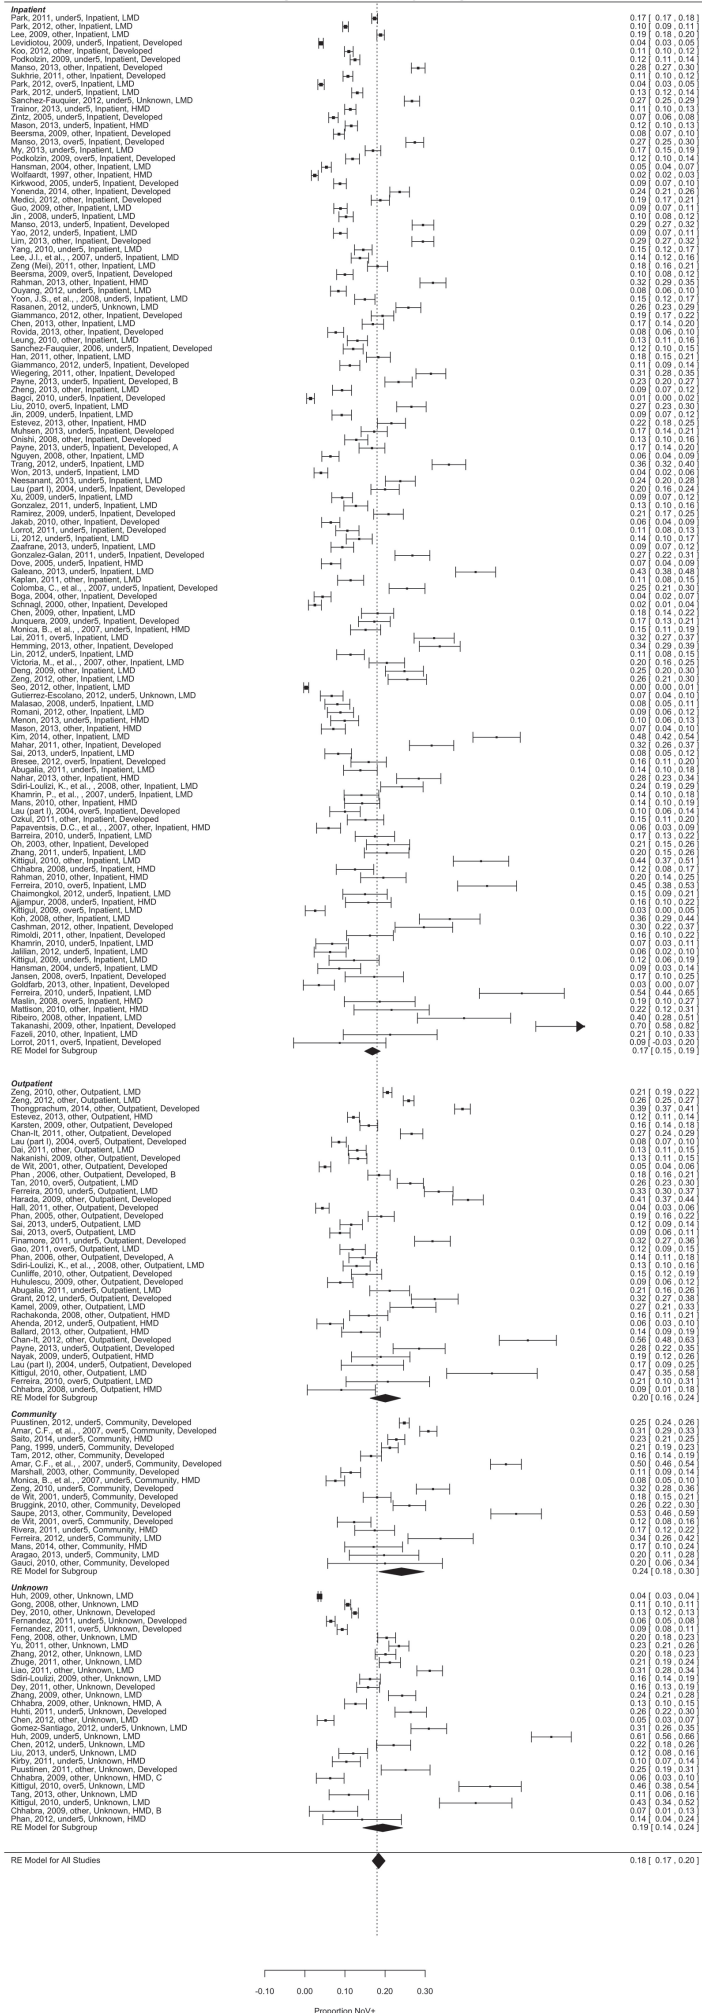

Fig. S1C: All Studies, by Dev. Index

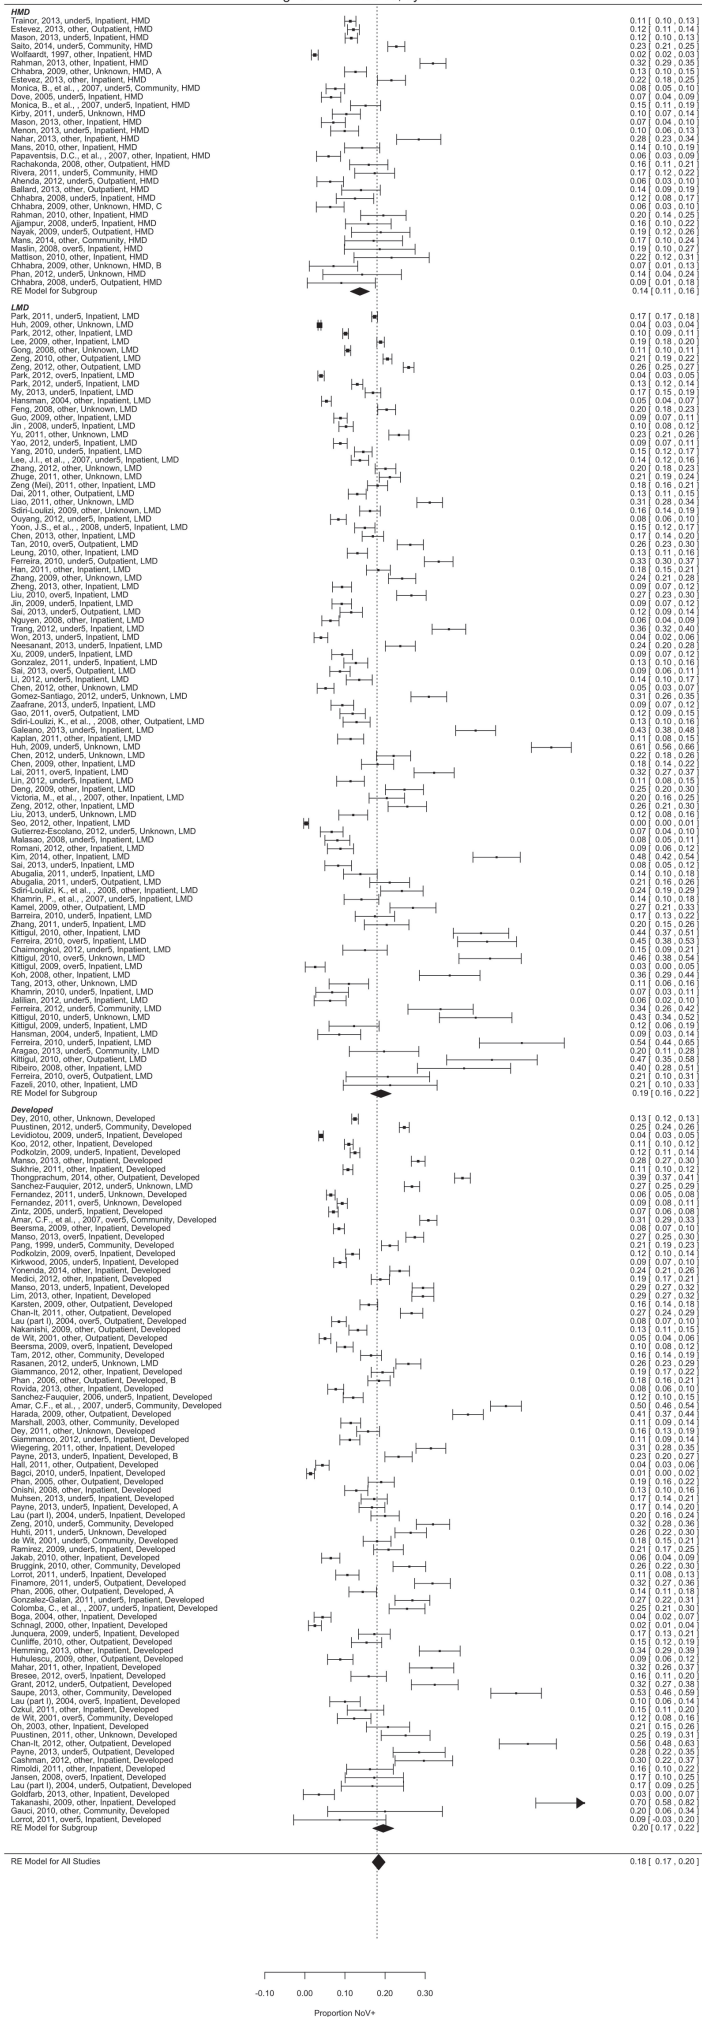

0.10 0.00 0.10 0.20 0.30  
Proportion Nev+



Fig. S1D: All Studies, by Strain

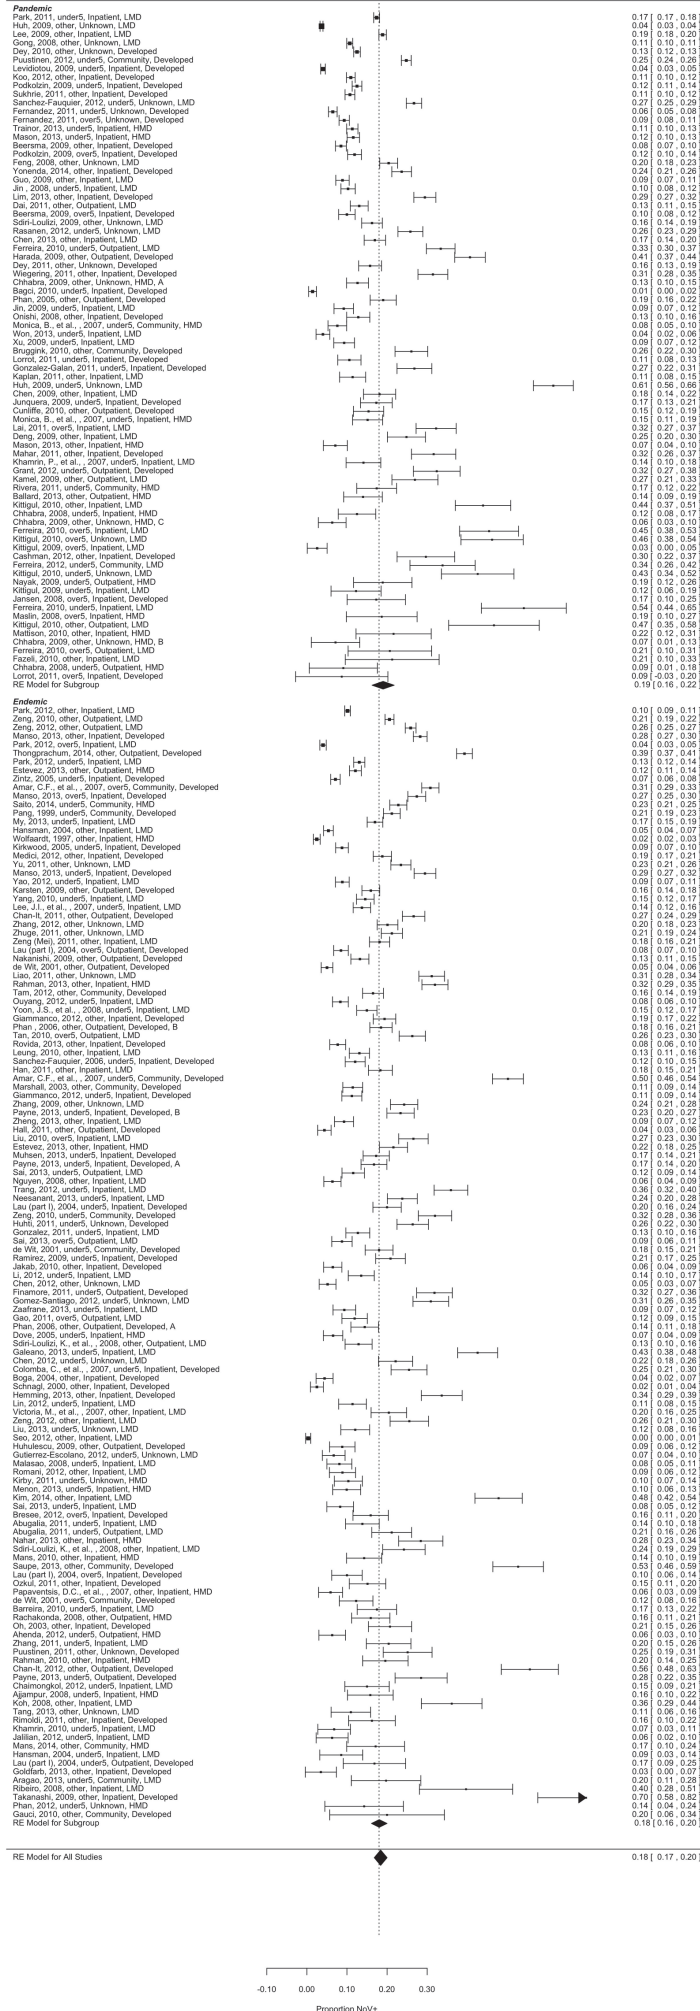

Fig. S2: Alternate Age Stratification

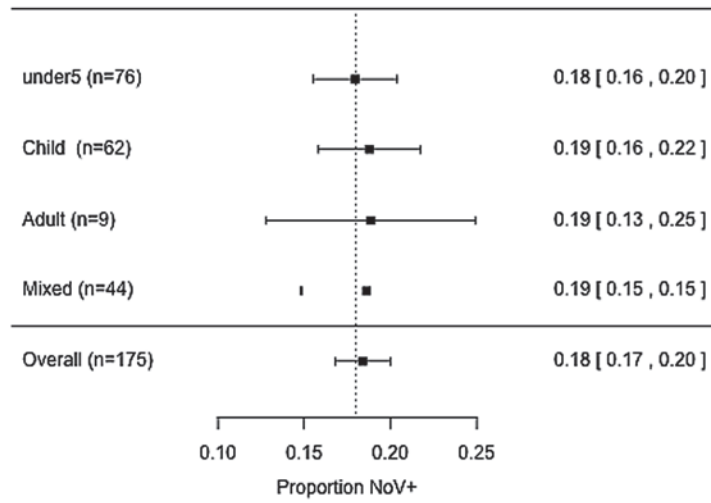

Supplement: NIHMS1679443-supplement-Supplementary_Info.pdf [file NIHMS1679443-supplement-Supplementary_Info.pdf]
